# Supplementary material for: Analysis of the Effect of Network Structure and Disulfide Concentration on Vitrimer Properties
Source: MDPI journal article supplement (doi:10.3390/polym15204123), 2023-10-17
Supplement: s1 [file s1]

Electronic supplementary information (ESI)

# Analysis of the Effect of Network Structure and Disulfide Concentration on Vitrimer Properties

Itxaso Azcune <sup>1</sup>, Edurne Elorza <sup>1</sup>, Alaitz Ruiz de Luzuriaga <sup>1</sup>, Arrate Huegun <sup>1</sup>, Alaitz Rekondo <sup>1,\*</sup> and Hans-Jürgen Grande <sup>1,2</sup>

<sup>1</sup> CIDETEC, Basque Research and Technology Alliance (BRTA), Paseo Miramón, 196, 20014 Donostia-San Sebastián, Spain; iazcune@cidetec.es (I.A.); eelorza@cidetec.es (E.E.); aruiz@cidetec.es (A.R.d.L.); ahuegun@cidetec.es (A.H.); hgrande@cidetec.es (H.J.G.)

<sup>2</sup> University of the Basque Country (UPV/EHU), Advanced Polymers and Materials—Physics, Chemistry and Technology Department, , Avda. Tolosa 72, 20018 Donostia-San Sebastian, Spain

\* Correspondence: arekondo@cidetec.es

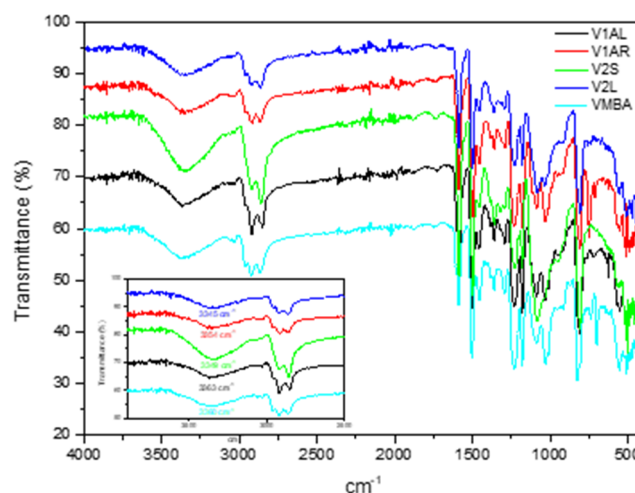

**Figure S1:** FTIR spectra all prepared vitrimers.

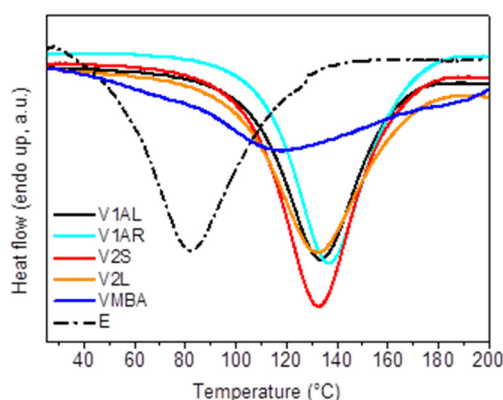

**Figure S2:** Curing thermograms of epoxy resins measured by DSC at 1 °C min<sup>−1</sup> heating rate.

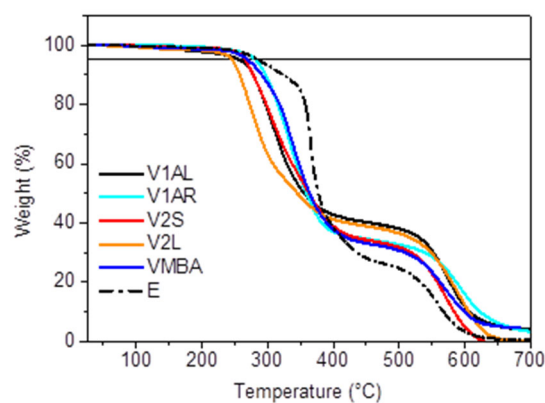

**Figure S3:** Thermograms of cured vitrimers measured by TGA at  $10\text{ }^{\circ}\text{C min}^{-1}$  heating rate under air atmosphere.

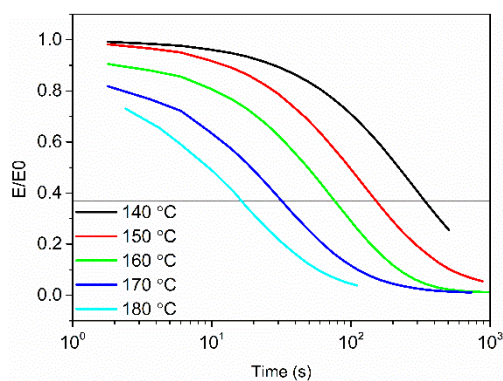

**Figure S4:** Stress relaxation curves of V1AL measured by DMA at T ( $T = 140\text{ }^{\circ}\text{C}$ ,  $150\text{ }^{\circ}\text{C}$ ,  $160\text{ }^{\circ}\text{C}$ ,  $170\text{ }^{\circ}\text{C}$ ,  $180\text{ }^{\circ}\text{C}$ ) under 1 % strain.

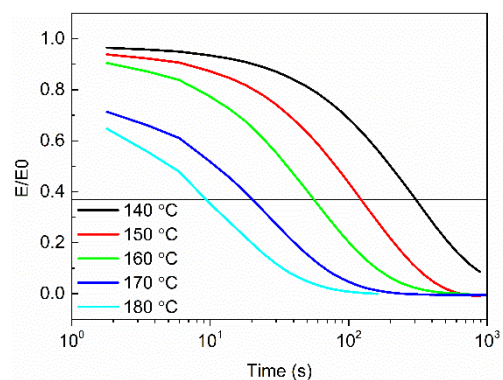

**Figure S5:** Stress relaxation curves of V1AR measured by DMA at T ( $T = 140\text{ }^{\circ}\text{C}$ ,  $150\text{ }^{\circ}\text{C}$ ,  $160\text{ }^{\circ}\text{C}$ ,  $170\text{ }^{\circ}\text{C}$ ,  $180\text{ }^{\circ}\text{C}$ ) under 1 % strain.

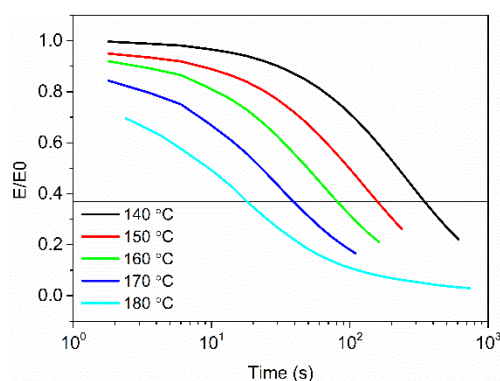

**Figure S6:** Stress relaxation curves of V2S measured by DMA at T (T = 140 °C, 150 °C, 160 °C, 170 °C, 180 °C) under 1 % strain.

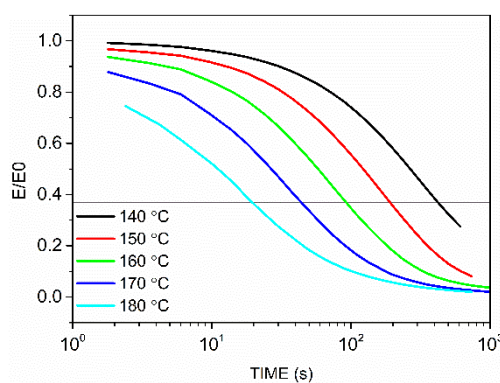

**Figure S7:** Stress relaxation curves of V2L measured by DMA at T (T = 140 °C, 150 °C, 160 °C, 170 °C, 180 °C) under 1 % strain.

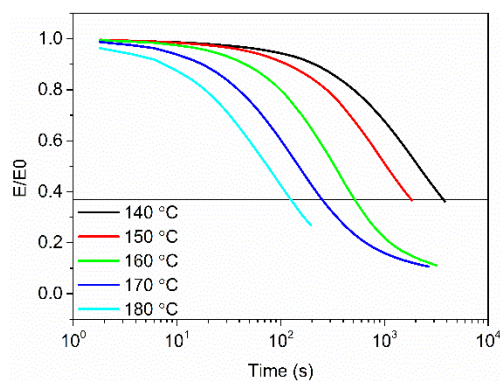

**Figure S8:** Stress relaxation curves of VMBA measured by DMA at T (T = 140 °C, 150 °C, 160 °C, 170 °C, 180 °C) under 1 % strain.
